# Supplementary material for: Assessment of Cervical Cancer with a Parameter-Free Intravoxel Incoherent Motion Imaging Algorithm
Source: PubMed Central journal article supplement — Korean J Radiol. 2017 Apr 3;18(3):510–8. doi: 10.3348/kjr.2017.18.3.510 (PMC5390620; doi:10.3348/kjr.2017.18.3.510), 2017-04-03
Supplement: kjr-18-510-s001.pdf [file kjr-18-510-s001.pdf]

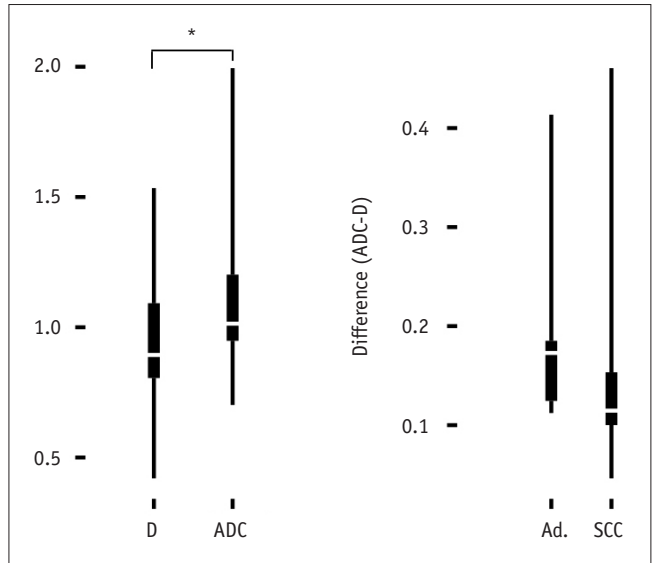

**Supplementary Fig. 1. Boxplots depicting ADC and D.**  
Left: significant ( $*p < 0.001$ ) difference between ADC (from monoexponential model) and D (from the biexponential IVIM model).  
Right: difference between ADC and D split by histological subtype ( $p = 0.13$ ). Ad. = adenocarcinoma, ADC = apparent diffusion coefficient, IVIM = intravoxel incoherent motion, SCC = squamous cell carcinoma
